# Supplementary material for: Au/ZnO/In2O3 nanoparticles for enhanced isopropanol gas sensing performance
Source: Royal Society of Chemistry journal article supplement (doi:10.1039/d3ra07507a), 2024-01-01
Supplement: d3ra07507a1.pdf [file d3ra07507a1.pdf]

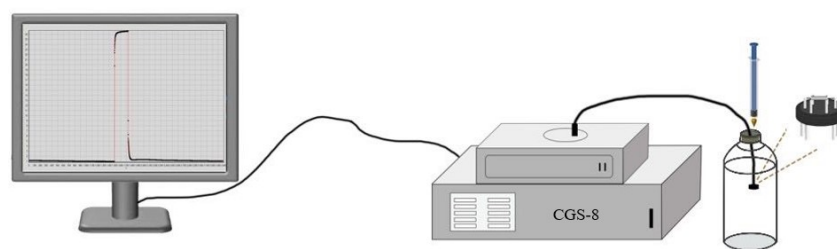

FS1. Schematic of sensor fabrication and gas testing.

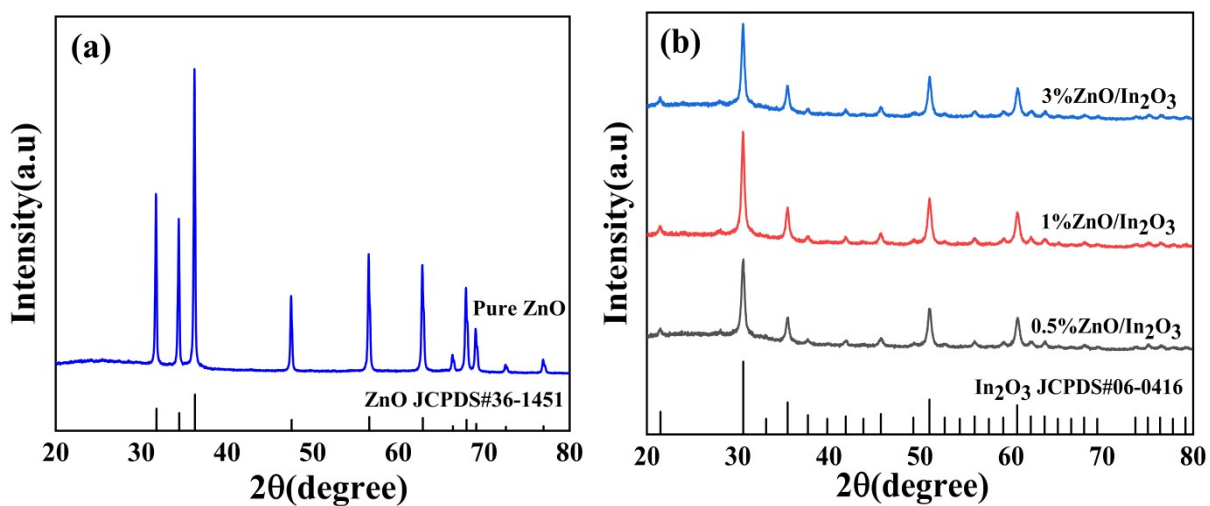

Fig.S2. X-ray diffraction pattern of Pure ZnO, x %ZnO/In<sub>2</sub>O<sub>3</sub> (x=0.5, 1, 3) samples.

Table S1 The Au and Zn additional concentrations in In<sub>2</sub>O<sub>3</sub> host

| sample           | 1mol %Au/1 mol% ZnO /In <sub>2</sub> O <sub>3</sub> | 2 mol%Au/1 mol% ZnO /In <sub>2</sub> O <sub>3</sub> | 3 mol %Au/1 mol% ZnO /In <sub>2</sub> O <sub>3</sub> |
|------------------|-----------------------------------------------------|-----------------------------------------------------|------------------------------------------------------|
| Au Concentration | 0.65                                                | 1.46                                                | 2.45                                                 |
| Zn Concentration | 0.73                                                | 0.76                                                | 0.72                                                 |
